# Supplementary material for: Enhancing the cycling performance of MgH2–LiBH4 based solid-state batteries via stacking pressure tailoring
Source: Royal Society of Chemistry journal article supplement (doi:10.1039/d4ma00177j), 2024-01-01
Supplement: d4ma00177j1.pdf [file d4ma00177j1.pdf]

## Supporting information

### **Enhancing cycle performance of MgH<sub>2</sub>-LiBH<sub>4</sub> based solid-state batteries via stacking pressure tailoring**

Xueye Zhuang, Haoliang Chen, Shiman He\*, Long Hu, Hui Wang \*, and Renzong Hu\*

School of Materials Science and Engineering, Guangdong Provincial Key Laboratory  
of Advanced Energy Storage Materials, South China University of Technology,  
Guangzhou, 510641, China

\*Corresponding author: [heshm@scut.edu.cn](mailto:heshm@scut.edu.cn)  
[mehwang@scut.edu.cn](mailto:mehwang@scut.edu.cn)  
[msrenzonghu@scut.edu.cn](mailto:msrenzonghu@scut.edu.cn)

## **Experimental sections**

**MgH<sub>2</sub> composite electrodes:** MgH<sub>2</sub> (98% purity) was obtained from MG power Corp. First, raw MgH<sub>2</sub> was refined by planetary milling for 10 h at 400 rpm in 1.5 MPa H<sub>2</sub> atmosphere. The MgH<sub>2</sub> composite electrodes were prepared by planetary milling of MgH<sub>2</sub>, LiBH<sub>4</sub> (95%, Aladdin) and conductive carbon (Super P) with a mass ratio of 1:1:2 at 400 rpm for 10 h.

**S cathode:** S powder was mixed with carbon nanotubes(CNTs) at a mass ratio of 1:1 and ground for 1 h. Then, the homogeneous mixture was transferred to a tube furnace and heated at 155 °C for 12 h and at 200 °C for 1 h under argon atmosphere to obtain the S@CNTs. The S cathode was obtained by hand milling S@CNTs, LiBH<sub>4</sub>, and conductive carbon (Super P) with a mass ratio of 4:4:2 for 1 hour.

All operations were carried out in a glovebox filled with argon gas and the water and oxygen content less than 0.1 ppm.

## **Material characterization**

X-ray diffraction (XRD, PANalytical) was used to determine the phase structure of the materials. Scanning electron microscopy (TESCAN GAIA3 model 2016 UHR) were used to examine the morphology of materials.

## **Cell assembly and electrochemical tests**

The all-solid-state battery was assembled in a battery mold with a pressure sensor. The cell mold is composed of two conductive stainless-steel pistons and a polyetherketone (Peek) cylinder with an inner diameter of 10 mm. Typically, 75 mg of LiBH<sub>4</sub> powder was added into the cell mold and pressed at 400 MPa, then 6 mg of MgH<sub>2</sub> electrode material was pressed on one side of the electrolyte, 9.5 mm diameter Li foil were covered on the other side in turn. The symmetric cells were assembled with the same method as all solid-state battery except that the MgH<sub>2</sub> electrode was changed to Li. To equip the Mg-LiH|LiBH<sub>4</sub>|S all-solid-state lithium battery, a MgH<sub>2</sub>||Li half-cell was first discharged to 0.3 V at a current density of 0.05 C. The lithium sheet was then uncovered, poured with 4 mg of S cathode and cold pressed at 400 MPa.

All electrochemical tests were measured at 125 °C to ensure the high ionic conductivity of LiBH<sub>4</sub> electrolyte. The Li|LiBH<sub>4</sub>|MgH<sub>2</sub> ASSBs were galvanostatically

charged and discharged range from 0.3 to 1 V (vs  $\text{Li}^+/\text{Li}$ ). The cutoff voltage of 0.3 V could avoid the formation of irreversible  $\text{LiMg}$  alloys.  $\text{Mg-LiH}|\text{LiBH}_4|\text{S}$  ASSBs were galvanostatically charged and discharged range from 0.8 to 2.6 V at 0.1 C ( $1 \text{ C} = 1672 \text{ mAh g}^{-1}$ ).

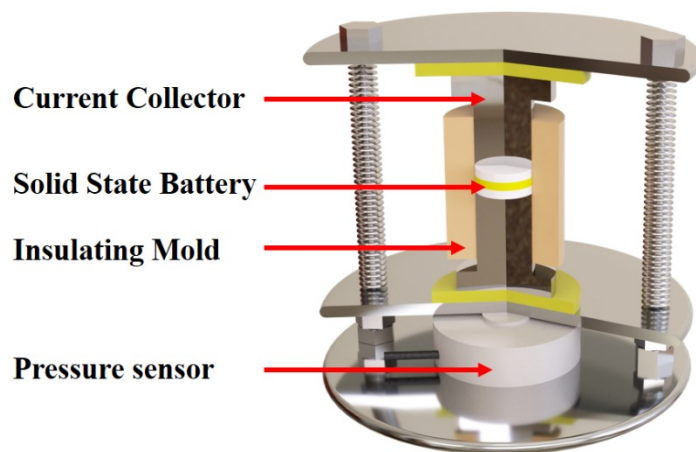

**Fig. S1** Schematic diagram of all-solid-state lithium battery with pressure sensor.

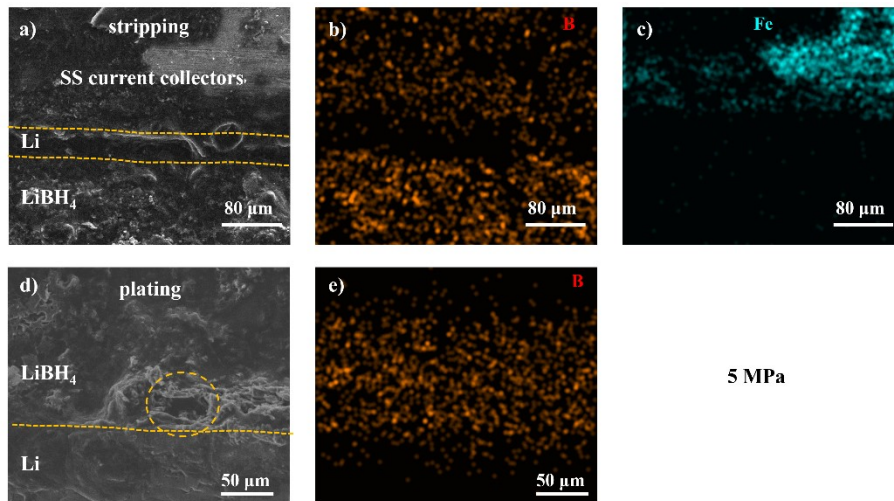

**Fig. S2** Cross-sectional SEM image of the LiBH<sub>4</sub> electrolyte with 5 MPa and the corresponding EDS mapping: (a-c) stripping state; (d-e) plating state.

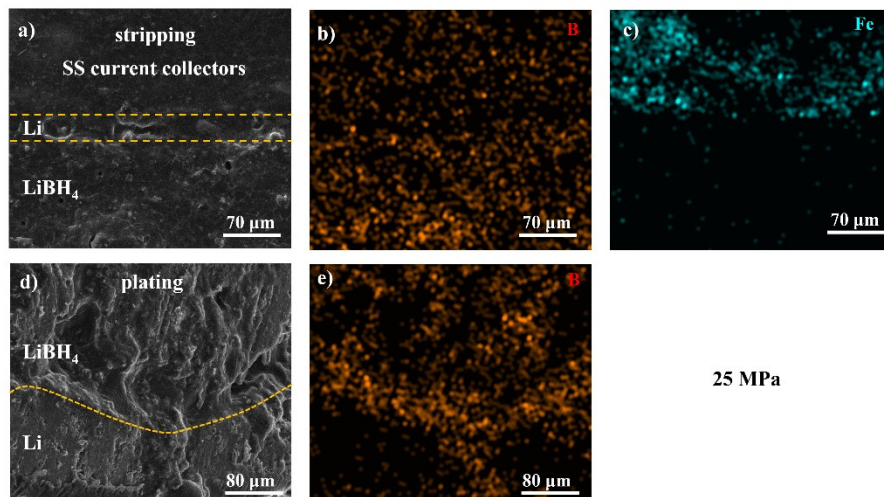

**Fig. S3** Cross-sectional SEM image of the LiBH<sub>4</sub> electrolyte with 25 MPa and the corresponding EDS mapping: (a-c) stripping state; (d-e) plating state.

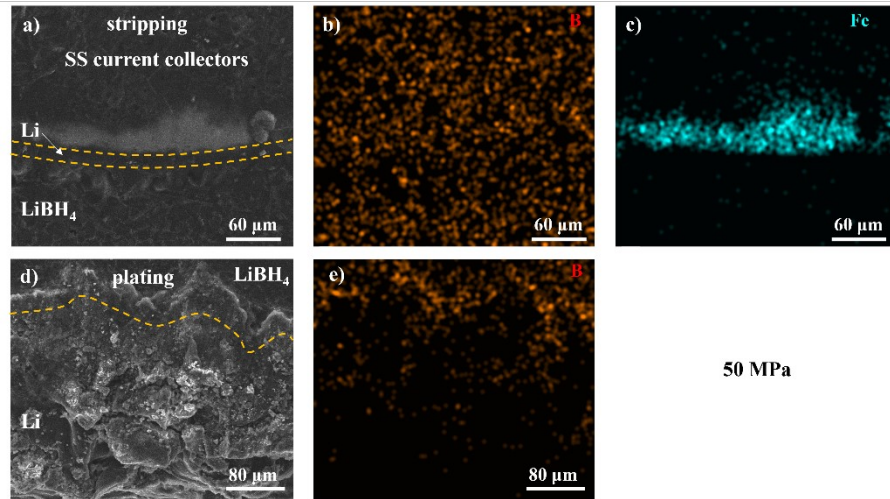

**Fig. S4** Cross-sectional SEM image of the  $\text{LiBH}_4$  electrolyte with 50 MPa and the corresponding EDS mapping: (a-c) stripping state; (d-e) plating state.

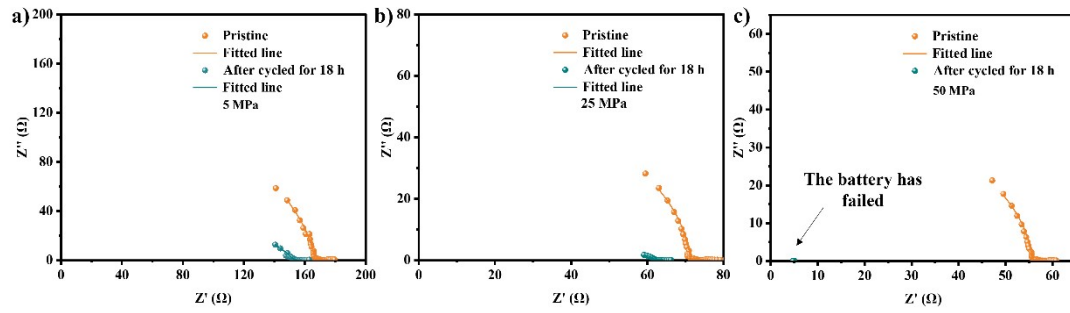

**Fig. S5** Electrochemical impedance spectra of the Li|LiBH<sub>4</sub>|Li cells before and after cycling with different stacking pressure: (a) 5 MPa; (b) 25 MPa and (c) 50 MPa.

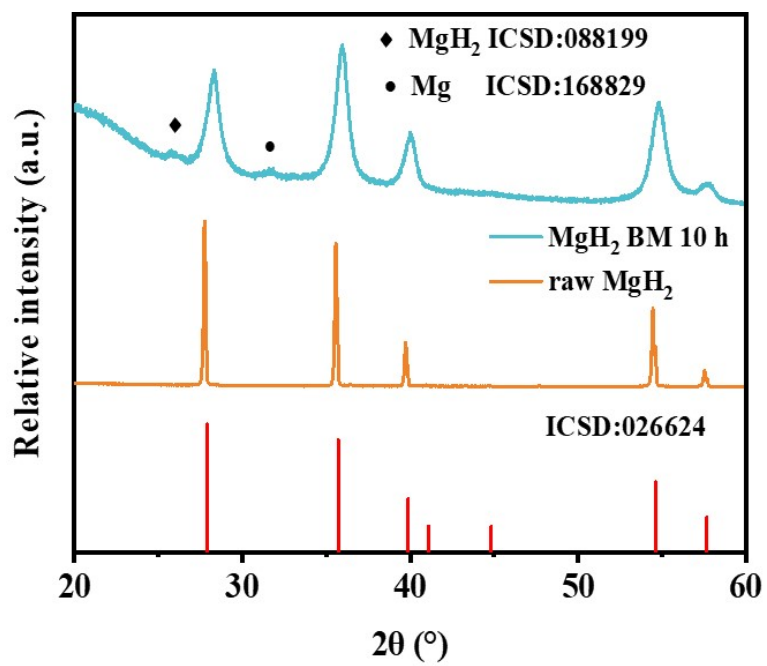

**Fig. S6** XRD patterns of raw MgH<sub>2</sub> and MgH<sub>2</sub> after ball milling for 10 h.



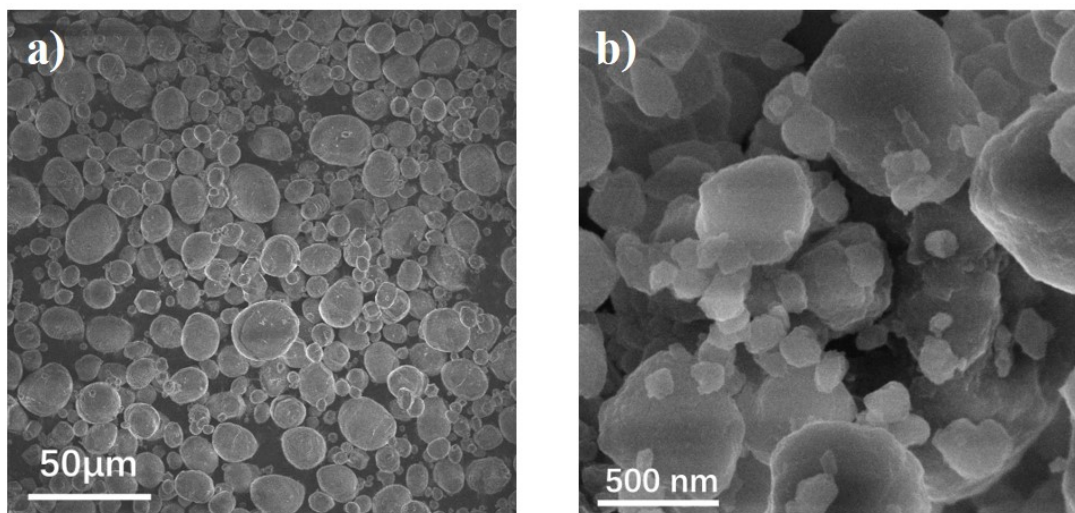

**Fig. S7** SEM images of (a) raw  $\text{MgH}_2$  and (b)  $\text{MgH}_2$  after ball milling for 10 h.

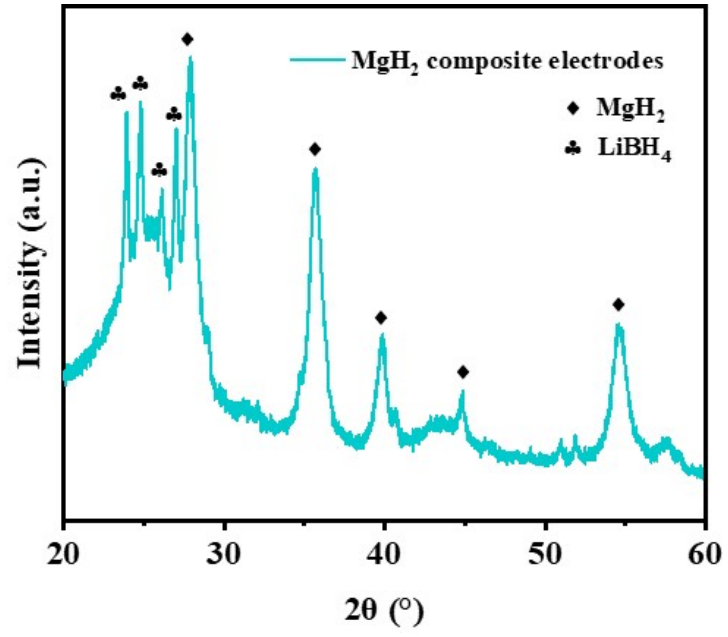

Fig. S8 XRD pattern of MgH<sub>2</sub> composite electrode.

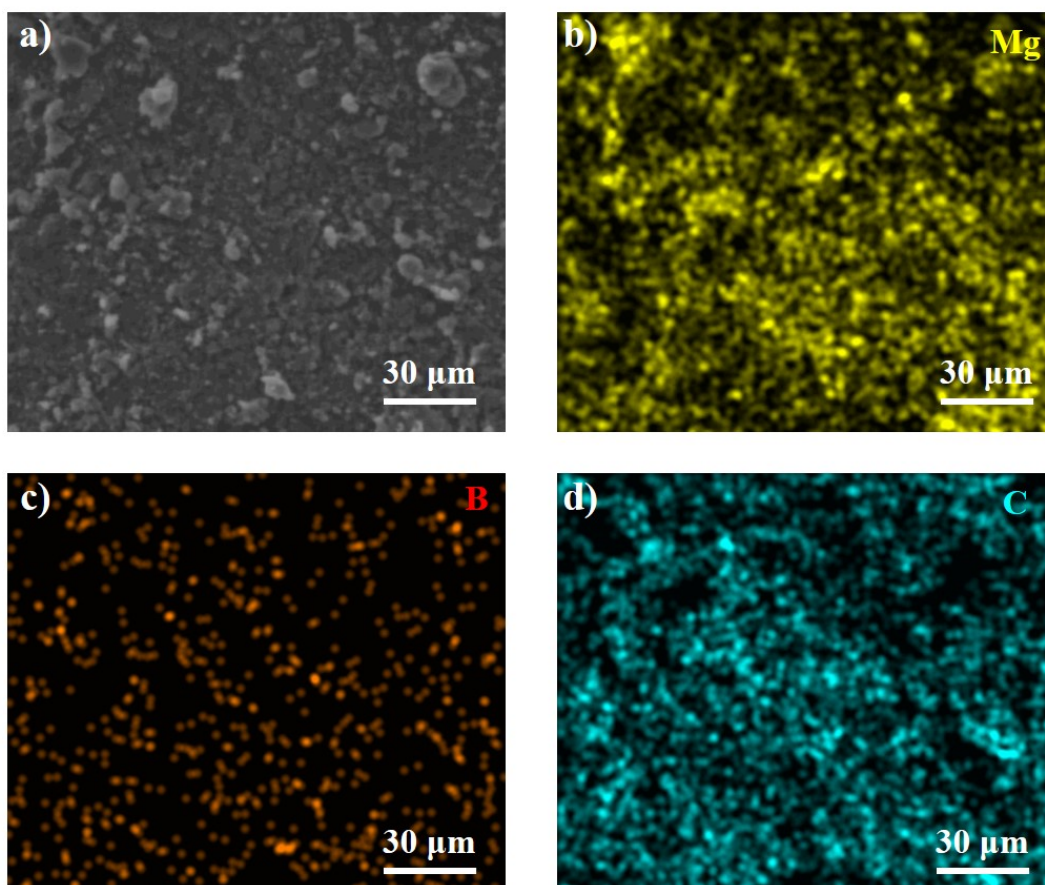

**Fig. S9** SEM image and the corresponding EDS mappings of  $\text{MgH}_2$  electrode.

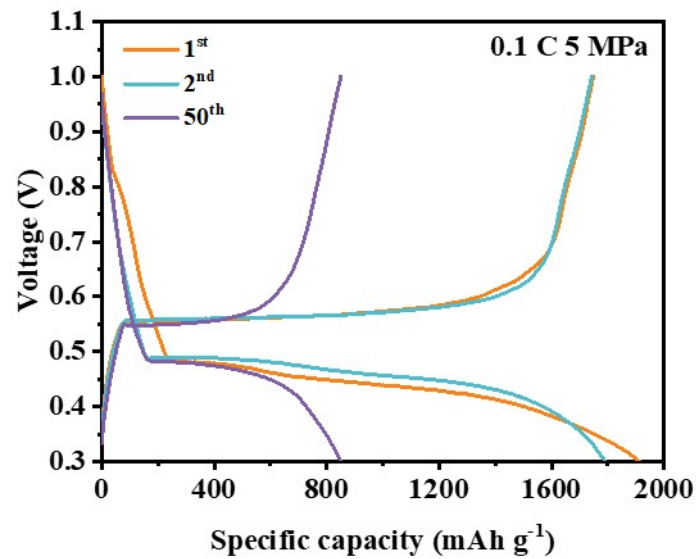

**Fig. S10** Galvanostatic charge–discharge profiles of Li|LiBH<sub>4</sub>|MgH<sub>2</sub> battery with a stacking pressure of 5 MPa at 0.1 C.

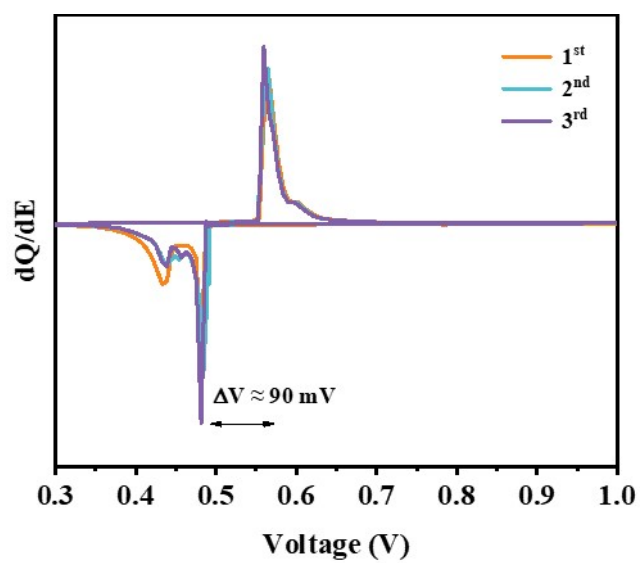

**Fig. S11** Derivative curves ( $dQ/dE$ ) of Li|LiBH<sub>4</sub>|MgH<sub>2</sub> battery with a stacking pressure of 25 MPa at 0.1 C.

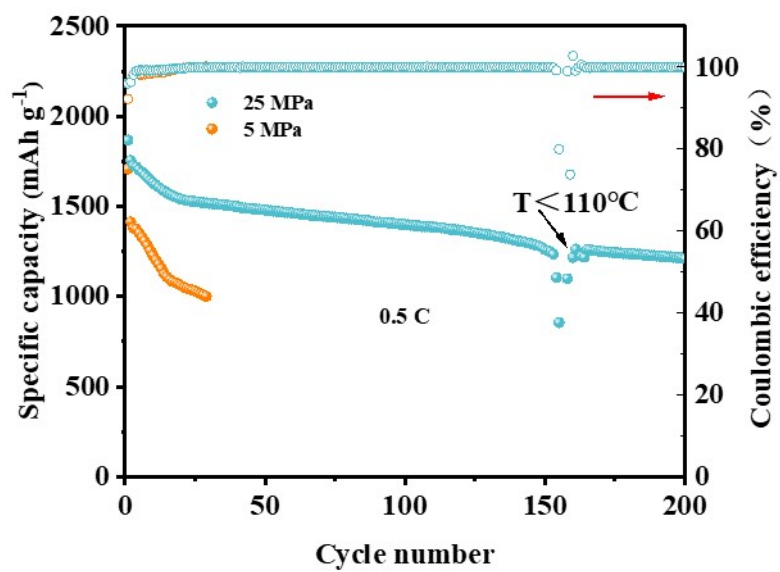

**Fig. S12** Cycling performances of the Li|LiBH<sub>4</sub>|MgH<sub>2</sub> batteries at different stacking pressures at 0.5 C.

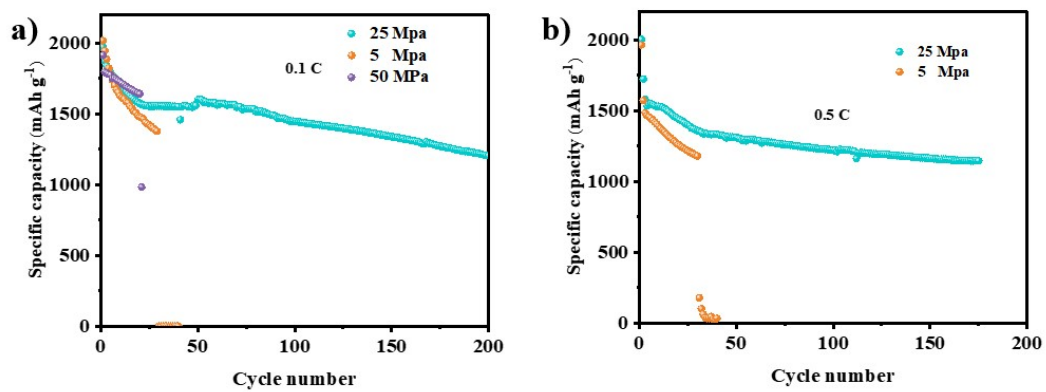

**Fig. S13** The repeatability testing of the cycling performances for Li|LiBH<sub>4</sub>|MgH<sub>2</sub> cells with different pressures at (a) 0.1 C and (b) 0.5 C.

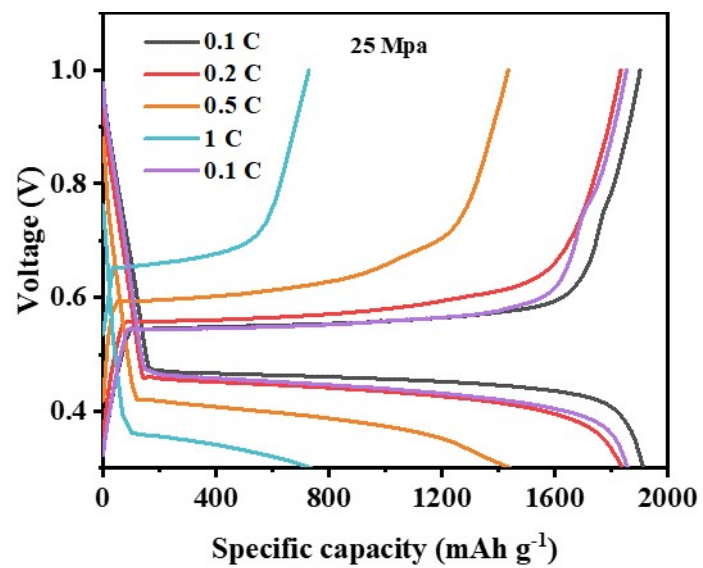

**Fig. S14** Galvanostatic charge–discharge profiles of the Li|LiBH<sub>4</sub>|MgH<sub>2</sub> battery in rate test at 25MPa.



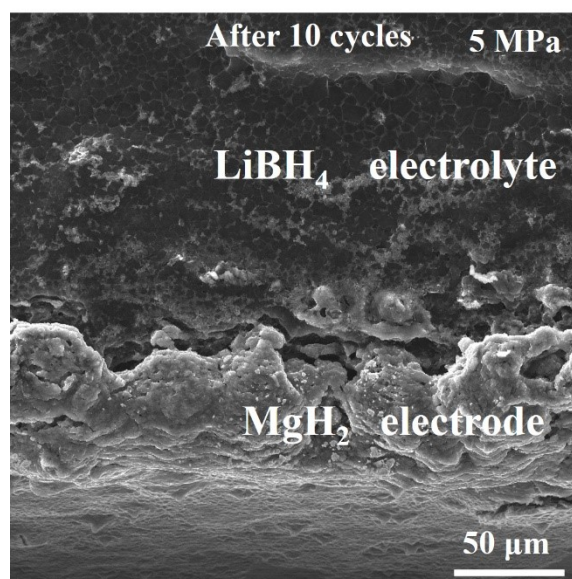

**Fig. S15** Cross-sectional SEM images of the interface between MgH<sub>2</sub> and the solid electrolyte after 10 cycles at 5 MPa, 0.1 C.

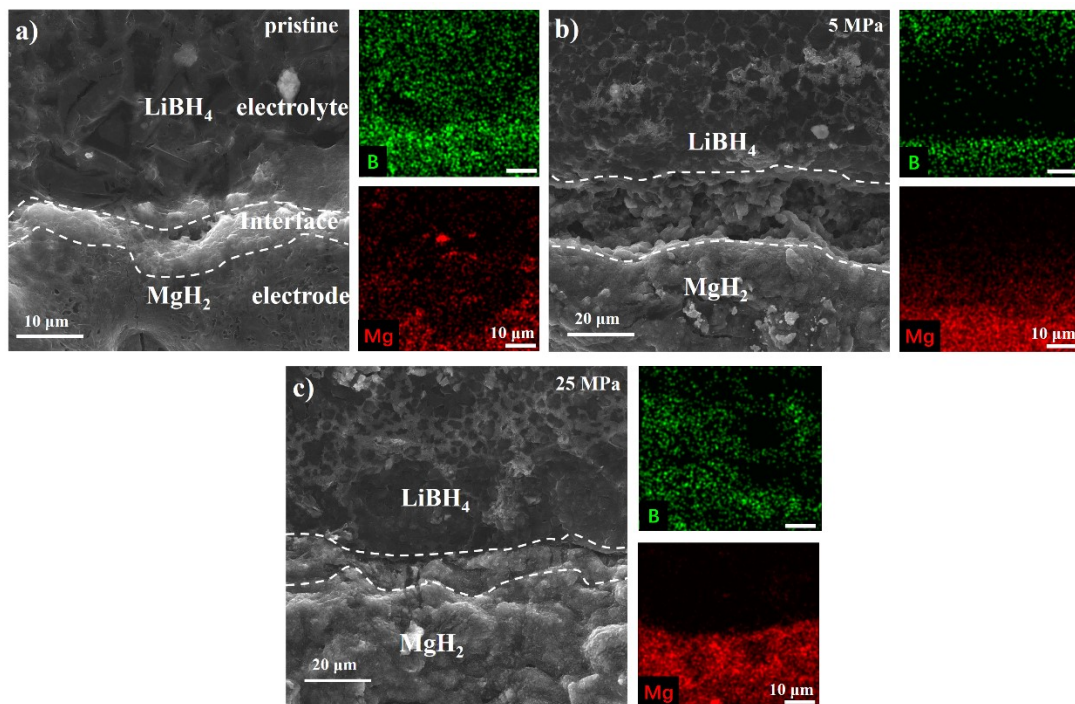

**Fig. S16** Cross-sectional SEM images and the corresponding EDS mappings of the interface between  $\text{MgH}_2$  and the solid electrolyte: (a) initial state and after 10 cycles at (b) 5 MPa (c) and 25 MPa at 0.1 C.

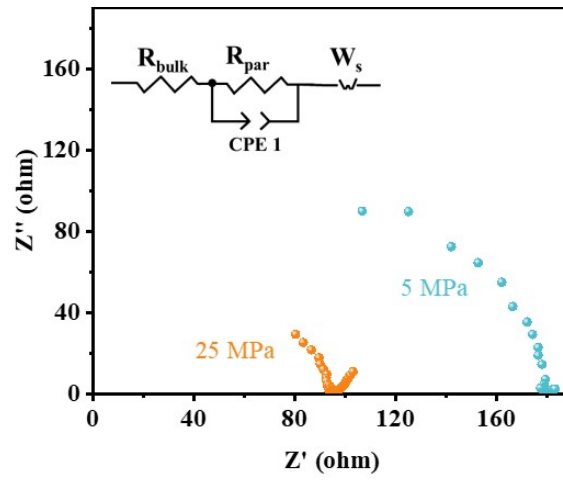

**Fig. S17** Electrochemical impedance spectra of Li|LiBH<sub>4</sub>|MgH<sub>2</sub> batteries at different stacking pressures.

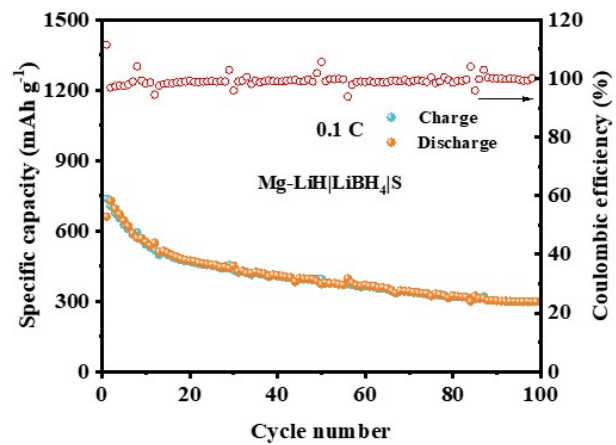

**Fig. S18.** The repeatability testing of the cycling performances for Mg-LiH|LiBH<sub>4</sub>|S cell with 25 MPa at 0.1 C.

**Table S1.** A comparison of the electrochemical properties of our MgH<sub>2</sub> electrodes with the previously reported works.

| electrode                                                       | Current density(mA g <sup>-1</sup> ) | cycle | Capacity retention (mAh g <sup>-1</sup> ) | Ref.     |
|-----------------------------------------------------------------|--------------------------------------|-------|-------------------------------------------|----------|
| MgH <sub>2</sub>                                                | 203.8                                | 200   | 1246.2                                    | This wok |
|                                                                 | 1019                                 | 200   | 1210.2                                    |          |
| MgH <sub>2</sub> -Nb <sub>2</sub> O <sub>5</sub>                | 800                                  | 50    | 924                                       | 1        |
| MgH <sub>2</sub> -CoO                                           | 67.5                                 | 20    | 910                                       | 2        |
| MgH <sub>2</sub> -Al <sub>2</sub> O <sub>3</sub>                | 200                                  | 9     | 580                                       | 3        |
| MgH <sub>2</sub> - TiH <sub>2</sub>                             | 34                                   | 10    | 865                                       | 4        |
| MgH <sub>2</sub> -VGCF                                          | 1000                                 | 50    | 1221                                      | 5        |
| Nd <sub>4</sub> Mg <sub>80</sub> Ni <sub>8</sub> H <sub>x</sub> | 203.8                                | 100   | 1191                                      | 6        |
|                                                                 | 2038                                 | 100   | 997                                       |          |
| MgH <sub>2</sub> -graphene                                      | 100                                  | 50    | 1214                                      | 7        |
|                                                                 | 400                                  | 200   | 597                                       |          |
| MgH <sub>2</sub> -graphene@MgBH <sub>4</sub>                    | 200                                  | 150   | 1498                                      | 8        |
|                                                                 | 1000                                 | 350   | 1318                                      |          |

## Reference

- 1 L. Zeng, K. Kawahito, S. Ikeda, T. Ichikawa, H. Miyaoka, Y. Kojima. *Chem. Commun (Camb)*.2015, **51**(48), 9773-9776.
- 2 A. El Kharbachi, H. Uesato, H. Kawai, S. Wenner, H. Miyaoka, M. H. Sørby, H. Fjellvåg, T. Ichikawa, B. C. Hauback. *RSC Adv*.2018, **8**(41), 23468-74.
- 3 T. I. Suguru Ikeda, Kiyotaka Goshome, Shotaro Yamaguchi, Hiroki Miyaoka & Yoshitsugu Kojima *J. Solid State Electrochem*.2015, 19, (3639–3644).
- 4 A. H. Dao, N. Berti, P. López-Aranguren, J. Zhang, F. Cuevas, C. Jordy, M. Latroche. *J. Power Sources*.2018, **397**(143-149).
- 5 L. Zeng, T. Ichikawa, K. Kawahito, H. Miyaoka, Y. Kojima. *ACS Appl Mater Interfaces*.2017, **9**(3), 2261-6.
- 6 P. Gao, S. Ju, Z. Liu, G. Xia, D. Sun, X. Yu. *ACS Nano*.2022, 16, 8040.
- 7 Y. Lv, X. Zhang, W. Chen, S. Ju, Z. Liu, G. Xia, T. Ichikawa, T. Zhang, X. Yu. *J. Mater. Sci. Technol*.2023, **155**(47-53).
- 8 Y. Huang, P. Gao, T. Zhang, X. Zhang, G. Xia, F. Fang, D. Sun, Z. Guo, X. Yu. *Small*.2023, **19**(26), e2207210.
